# Supplementary figures and images for: Rational design of manganese-μ-azido 3D compounds by using diazines as co-ligands: synthesis, structure and magnetic behaviour
Source: Royal Society of Chemistry journal article supplement (doi:10.1039/b900417c), 2009-01-01

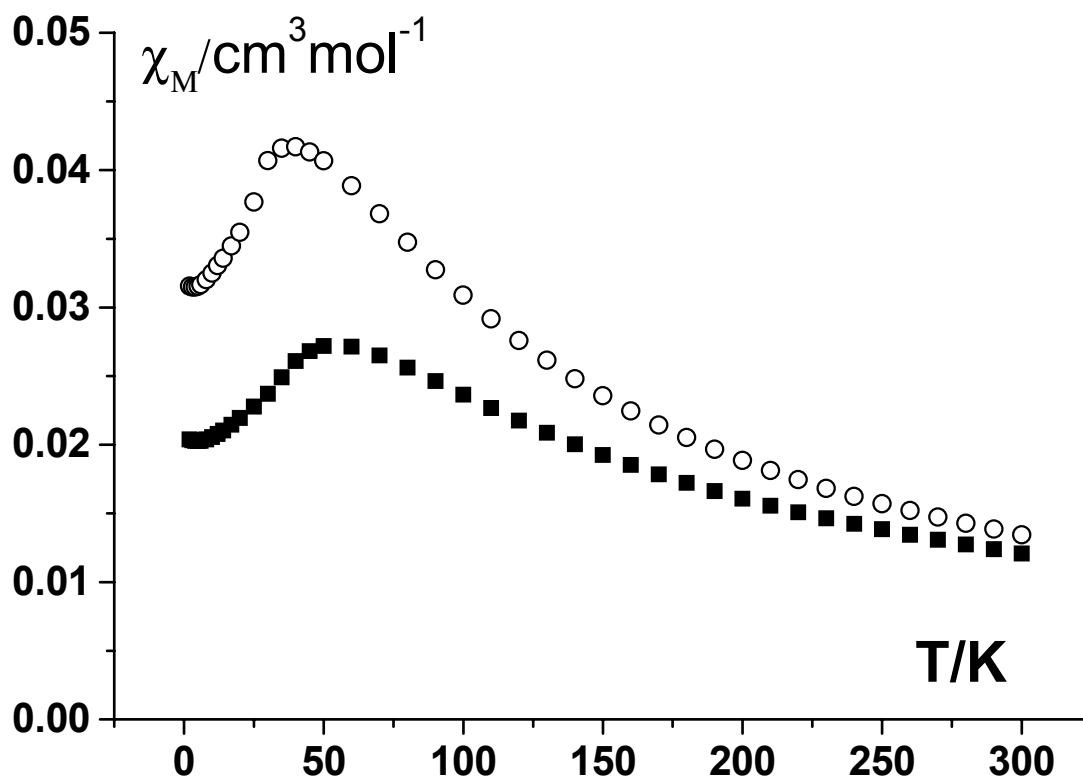

**Figure S1.**  $\chi_M T$  vs T plot in the 300-2 K range of temperatures for **2** (open circles) and **3** (open squares).

Supplement: b900417c.pdf [file b900417c.pdf]
